# Supplementary material
Source: PubMed Central journal article supplement (PMC7948274)
Supplement: advancesADV2020003937-suppl1.pdf [file advancesADV2020003937-suppl1.pdf]

**Supplemental Table. Multinomial logistic regression treating steroid sensitive aGVHD as the reference state**

| Factors                                                                                                                                                                                                                    | N   | OR of Dependent aGVHD (95% CI) | P           | OR of Resistant aGVHD (95% CI) | P               | Overall P       |
|----------------------------------------------------------------------------------------------------------------------------------------------------------------------------------------------------------------------------|-----|--------------------------------|-------------|--------------------------------|-----------------|-----------------|
| <b>Gender</b>                                                                                                                                                                                                              |     |                                |             |                                |                 | 0.86            |
| Male                                                                                                                                                                                                                       | 242 | 1.0 (reference)                |             | 1.0 (reference)                |                 |                 |
| Female                                                                                                                                                                                                                     | 143 | 0.9 (0.5-1.6)                  |             | 1.0 (0.6-1.7)                  |                 |                 |
| <b>Age</b>                                                                                                                                                                                                                 |     |                                |             |                                |                 | <b>0.05</b>     |
| <18                                                                                                                                                                                                                        | 67  | 1.0 (reference)                |             | 1.0 (reference)                |                 |                 |
| 18-60                                                                                                                                                                                                                      | 228 | 3.9 (1.4-11.3)                 | <b>0.02</b> | 1.4 (0.6-3.2)                  | 0.57            |                 |
| 61+                                                                                                                                                                                                                        | 48  | 1.4 (0.6-3.2)                  | 0.13        | 2.1 (0.7-6.0)                  | 0.32            |                 |
| <b>Donor Type</b>                                                                                                                                                                                                          |     |                                |             |                                |                 | <b>0.05</b>     |
| Matched Sibling                                                                                                                                                                                                            | 112 | 1.0 (reference)                |             | 1.0 (reference)                |                 |                 |
| Haploidentical                                                                                                                                                                                                             | 10  | 1.8 (0.3-11.1)                 | 0.50        | 1.3 (0.2-7.2)                  | 0.74            |                 |
| URD                                                                                                                                                                                                                        | 60  | 1.1 (0.4-3.2)                  | 0.83        | 3.0 (1.2-7.4)                  | <b>0.02</b>     |                 |
| s/dUCB                                                                                                                                                                                                                     | 203 | 0.8 (0.4-1.5)                  | 0.74        | 0.8 (0.5-1.5)                  | 0.55            |                 |
| <b>HCT-CI</b>                                                                                                                                                                                                              |     |                                |             |                                |                 | 0.27            |
| Low Risk (0)                                                                                                                                                                                                               | 192 | 1.0 (reference)                |             | 1.0 (reference)                |                 |                 |
| Intermediate Risk (1-2)                                                                                                                                                                                                    | 95  | 0.8 (0.4-1.5)                  |             | 0.8 (0.4-1.5)                  |                 |                 |
| High Risk (3+)                                                                                                                                                                                                             | 98  | 1.3 (0.6-2.7)                  |             | 1.8 (0.9-3.4)                  |                 |                 |
| <b>Conditioning</b>                                                                                                                                                                                                        |     |                                |             |                                |                 | 0.60            |
| MAC                                                                                                                                                                                                                        | 178 | 1.0 (reference)                |             | 1.0 (reference)                |                 |                 |
| RIC                                                                                                                                                                                                                        | 207 | 0.8 (0.4-1.5)                  |             | 0.7 (0.4-1.4)                  |                 |                 |
| <b>DRI (CIBMTR)</b>                                                                                                                                                                                                        |     |                                |             |                                |                 | 0.58            |
| Low Risk                                                                                                                                                                                                                   | 47  | 1.0 (reference)                |             | 1.0 (reference)                |                 |                 |
| Intermediate Risk                                                                                                                                                                                                          | 244 | 1.2 (0.5-2.9)                  |             | 1.4 (0.6-3.3)                  |                 |                 |
| High/Very Risk                                                                                                                                                                                                             | 54  | 0.8 (0.2-2.4)                  |             | 1.6 (0.6-4.4)                  |                 |                 |
| Non-Malignant                                                                                                                                                                                                              | 40  | 1.3 (0.3-5.2)                  |             | 0.9 (0.2-3.0)                  |                 |                 |
| <b>Transplant Year</b>                                                                                                                                                                                                     |     |                                |             |                                |                 | 0.33            |
| 2008-2011                                                                                                                                                                                                                  | 158 | 1.0 (reference)                |             | 1.0 (reference)                |                 |                 |
| 2012-2016                                                                                                                                                                                                                  | 227 | 0.6 (0.4-1.2)                  |             | 0.8 (0.5-1.5)                  |                 |                 |
| <b>MiN aGVHD Risk</b>                                                                                                                                                                                                      |     |                                |             |                                |                 | <b>&lt;0.01</b> |
| Standard Risk                                                                                                                                                                                                              | 301 | 1.0 (reference)                |             | 1.0 (reference)                |                 |                 |
| High Risk                                                                                                                                                                                                                  | 84  | 1.5 (0.7-3.2)                  | 0.26        | 2.4 (1.3-4.6)                  | <b>&lt;0.01</b> |                 |
| <b>Abbreviations:</b> OR=odds ratio; aGVHD=acute graft-versus-host disease; URD=unrelated donor; s/dUCB=single/double umbilical cord blood; MAC=myeloablative, RIC=reduced intensity;DRI=disease risk index; MiN=Minnesota |     |                                |             |                                |                 |                 |
